# Supplementary material
Source: ML conference proceedings conference paper supplement (https://proceedings.mlr.press/v84/pansari18a.html)
Supplement: Supplementary file [file pansari18a-supp.pdf]

# Appendix: Worst-case Optimal Submodular Extensions for Marginal Estimation

## 1 Proofs for Potts Model Extension

**Remark 1** We show using induction over the number of variables that with 1-of- $L$  encoding for Potts,

$$\sum_{A \in \mathcal{M}} \exp(-s(A)) = \prod_{a=1}^N \sum_{i=1}^L \exp(-s_{ai}). \quad (1)$$

*Proof.* Let  $t$  be the number of variables,  $V^t$  be the corresponding ground set and  $\mathcal{M}^t$  be the sets corresponding to valid labelings. Equation (1) clearly holds for  $t = 1$ .

Let us assume that the relation holds for  $t = N$ , that is,

$$\sum_{A^N \in \mathcal{M}^N} \exp(-s(A^N)) = \prod_{a=1}^N \sum_{i=1}^L \exp(-s_{ai}) \quad (2)$$

For  $t = N + 1$ ,

$$\begin{aligned} \sum_{A^{N+1} \in \mathcal{M}^{N+1}} \exp(-s(A^{N+1})) &= \sum_{i=1}^L \sum_{A^N \in \mathcal{M}^N} \exp(-s(A^N) - s_{N+1,i}) \\ &= \sum_{i=1}^L \exp(-s_{N+1,i}) \sum_{A^N \in \mathcal{M}^N} \exp(-s(A^N)) \\ &= \sum_{i=1}^L \exp(-s_{N+1,i}) \prod_{a=1}^N \sum_{i=1}^L \exp(-s_{ai}) \\ &= \prod_{a=1}^{N+1} \sum_{i=1}^L \exp(-s_{ai}) \end{aligned} \quad (3)$$

□

**Remark 2** Given any submodular extension  $F(\cdot)$  of a Potts energy function  $E(\cdot)$ , its Lovasz extension  $f(\cdot)$  defines an LP relaxation of the MAP problem for  $E(\cdot)$  as

$$\min_{\mathbf{y} \in \Delta} f(\mathbf{y}). \quad (4)$$

*Proof.* By definition of a submodular extension and the Lovasz extension,  $E(\mathbf{x}) = F(A_{\mathbf{x}}) = f(1_{A_{\mathbf{x}}})$  for all valid labelings  $\mathbf{x}$ . Also, from property 1,  $f(\mathbf{y})$  is maximum of linear functions. Hence,  $f(\mathbf{y})$  is a piecewise linear relaxation of  $E(\mathbf{x})$ .

The domain  $\Delta$  is a polytope formed by union of  $N$  probability simplices

$$\Delta = \{\mathbf{y}_a \in \mathbb{R}^L | \mathbf{y}_a \succeq 0 \text{ and } \langle \mathbf{1}, \mathbf{y}_a \rangle = 1\} \quad (5)$$

With objective as maximum of linear functions and domain as a polytope, we have an LP relaxation of the corresponding MAP problem.  $\square$

**Proposition 1.** *In the limit  $T \rightarrow 0$ , the following problem for Potts energies*

$$\min_{\mathbf{s} \in EP(F)} g_T(\mathbf{s}) = \sum_{a=1}^N T \cdot \log \sum_{i=1}^L \exp\left(-\frac{s_{ai}}{T}\right). \quad (6)$$

becomes

$$- \min_{\mathbf{y} \in \Delta} f(\mathbf{y}). \quad (7)$$

*Proof.* In the limit of  $T \rightarrow 0$ , we can rewrite the above problem as

$$\min_{\mathbf{s} \in EP(F)} \sum_{a=1}^N \max_i (-s_{ai}). \quad (8)$$

In vector form, the problem becomes

$$\min_{\mathbf{s} \in EP(F)} \max_{\mathbf{y} \in \Delta} -\langle \mathbf{y}, \mathbf{s} \rangle \quad (9)$$

$$= - \max_{\mathbf{s} \in EP(F)} \min_{\mathbf{y} \in \Delta} \langle \mathbf{y}, \mathbf{s} \rangle \quad (10)$$

$\Delta$  is the union of  $N$  probability simplices:

$$\Delta = \{\mathbf{y}_a \in \mathbb{R}^L | \mathbf{y}_a \succeq 0 \text{ and } \langle \mathbf{1}, \mathbf{y}_a \rangle = 1\} \quad (11)$$

where  $\mathbf{y}_a$  is the component of  $\mathbf{y}$  corresponding to the  $a$ -th variable. By the minimax theorem for LP, we can reorder the terms:

$$- \min_{\mathbf{y} \in \Delta} \max_{\mathbf{s} \in EP(F)} \langle \mathbf{y}, \mathbf{s} \rangle \quad (12)$$

Recall that  $\max_{\mathbf{s} \in EP(F)} \langle \mathbf{y}, \mathbf{s} \rangle$  is the value of the Lovasz extension of  $F$  at  $\mathbf{y}$ , that is,  $f(\mathbf{y})$ . Hence, as  $T \rightarrow 0$ , the marginal inference problem converts to minimising the Lovasz extension under the simplices constraint:

$$- \min_{\mathbf{y} \in \Delta} f(\mathbf{y}) \quad (13)$$

$\square$

**Proposition 2.** *The objective function  $E(\mathbf{y})$  of the LP relaxation (P-LP) is the Lovasz extension of  $F_{Potts}(A) = \sum_{i=1}^L F_i(A)$ , where*

$$F_i(A) = \sum_a \phi_a(i) [|A \cap \{v_{ai}\}| = 1] + \sum_{(a,b) \in \mathcal{N}} \frac{w_{ab}}{2} \cdot [|A \cap \{v_{ai}, v_{bi}\}| = 1]. \quad (14)$$

*Proof.* Since  $F_{Potts}$  is sum of Ising models  $F_i$ , we first focus on a particular label  $i$  and then generalize. Consider a graph with only two variables  $X_a$  and  $X_b$  with an edge between them. The ground set in this case is  $\{v_{ai}, v_{bi}\}$ . Let the corresponding relaxed indicator variables be  $\mathbf{y} = \{y_{aj}, y_{bj}\}$ , such that  $y_{ai}, y_{bi} \in [0, 1]$  and assume  $y_{ai} > y_{bi}$ . The Lovasz extension is:

$$\begin{aligned} f(\mathbf{y}) &= y_{ai} \cdot [F_i(\{v_{ai}\}) - F_i(\{\})] + y_{bi} \cdot [F_i(\{v_{ai}, v_{bi}\}) - F_i(\{v_{ai}\})] \\ &= y_{ai} \cdot \left[ \left( \phi_a(j) + \frac{w_{ab}}{2} \right) - 0 \right] + y_{bi} \cdot \left[ \left( \phi_a(j) + \phi_b(j) \right) - \left( \phi_a(j) + \frac{w_{ab}}{2} \right) \right] \\ &= \phi_a(j) \cdot y_{ai} + \phi_b(j) \cdot y_{bi} + \frac{w_{ab}}{2} \cdot (y_{ai} - y_{bi}) \end{aligned} \quad (15)$$

In general for both orderings of  $y_{ab}$  and  $y_{bi}$ , we can write

$$f(\mathbf{y}) = \phi_a(j) \cdot y_{ai} + \phi_b(j) \cdot y_{bi} + \frac{w_{ab}}{2} \cdot |y_{ai} - y_{bi}| \quad (16)$$

Extending Lovasz extension (equation (16)) to all variables and labels gives  $E(\mathbf{y})$  in (P-LP).  $\square$

## 2 Proofs for Hierarchical Potts Model Extension

**Transformed Tightest LP Relaxation** We take (T-LP) and rewrite it using indicator variables for all labels and meta-labels. Let  $\mathcal{R}$  denote the set of all labels and meta-labels, that is, all nodes in the tree apart from the root. Also, let  $\mathcal{L}$  denote the set of labels, that is, the leaves of the tree. Let  $T_i$  denote the subtree which is rooted at the  $i$ -th node. We introduce an indicator variable  $z_{ai} \in \{0, 1\}$ , where

$$z_{ai} = \begin{cases} y_{ai} & \text{if } i \in \mathcal{L} \\ y_a(T_i) & \text{if } i \in \mathcal{R} - \mathcal{L} \end{cases} \quad (17)$$

We need to extend the definition of unary potentials to the expanded label space as follows:

$$\text{where } \phi'_a(i) = \begin{cases} \phi_a(i) & \text{if } i \in \mathcal{L} \\ 0 & \text{if } i \in \mathcal{R} - \mathcal{L} \end{cases} \quad (18)$$

We can now rewrite problem (T-LP) in terms of new indicator variables  $z_{ai}$ :

$$\begin{aligned} \text{(T-LP-FULL)} \quad \min \tilde{E}(\mathbf{z}) &= \sum_{i \in \mathcal{R}} \sum_{a \in \mathcal{X}} \phi'_a(i) \cdot z_{ai} + \\ &\quad \sum_{i \in \mathcal{R}} \sum_{(a,b) \in \mathcal{N}} w_{ab} \cdot l_{T_i} \cdot |z_{ai} - z_{bi}| \\ \text{such that } \mathbf{z} &\in \Delta' \end{aligned} \quad (19)$$

where  $\Delta'$  is the convex hull of the vectors satisfying

$$\sum_{i \in \mathcal{L}} z_{ai} = 1, \quad z_{ai} \in \{0, 1\} \quad \forall a \in \mathcal{X}, i \in \mathcal{L} \quad (20)$$

$$\text{and } z_{ai} = \sum_{j \in L(T_i)} z_{aj}. \quad \forall a \in \mathcal{X}, i \in \mathcal{R} - \mathcal{L} \quad (21)$$

Constraint (21) ensures consistency among labels and meta-labels, that is, if a label is assigned then all the meta-labels which lie on the path from the root to the label should be assigned as well. We are now going to identify a suitable set encoding and the worst-case optimal submodular extension using (T-LP-FULL).

**Remark 3** Given any submodular extension  $F(\cdot)$  of a hierarchical Potts energy function  $E(\cdot)$ , its Lovasz extension defines an LP relaxation of the corresponding MAP estimation problem as

$$\min_{\mathbf{z} \in \Delta'} f(\mathbf{z}). \quad (22)$$

*Proof.* By definition of a submodular extension and the Lovasz extension,  $E(\mathbf{x}) = F(A_{\mathbf{x}}) = f(\mathbf{1}_{A_{\mathbf{x}}})$  for all valid labelings  $\mathbf{x}$ . Also, from property 1,  $f(\mathbf{y})$  is maximum of linear functions. Hence,  $f(\mathbf{y})$  is a piecewise linear relaxation of  $E(\mathbf{x})$ .

We can write the domain  $\Delta'$  as

$$\Delta' = \{\mathbf{y}_a \in \mathbb{R}^M \mid \mathbf{y}_a \succeq \mathbf{0}, \langle \mathbf{1}, \mathbf{y}_a^{label} \rangle = 1, \mathbf{y}_a(p_{ai}) = \mathbf{1} \text{ or } \mathbf{y}_a(p_{ai}) = \mathbf{0} \forall i \in [1, L]\} \quad (23)$$

where  $\mathbf{y}_a$  is the component of  $\mathbf{y}$  corresponding to the  $a$ -th variable,  $\mathbf{y}_a^{label}$  is the component of  $\mathbf{y}_a$  corresponding to the  $L$  labels, and  $\mathbf{y}_a(p_{ai})$  is the component of  $\mathbf{y}_a$  corresponding to the elements of  $p_{ai}$ .

Since  $\Delta'$  is defined by linear equalities and inequalities, it is a polytope. With objective as maximum of linear functions and domain as a polytope, we have an LP relaxation of the corresponding MAP problem.  $\square$

**Proposition 3.** In the limit  $T \rightarrow 0$ , the following problem for hierarchical Potts energies

$$\min_{\mathbf{s} \in EP(F)} g_T(\mathbf{s}) = \sum_{a=1}^N T \cdot \log \sum_{i=1}^L \exp(-\frac{s'_{ai}}{T}). \quad (24)$$

becomes:

$$- \min_{\mathbf{z} \in \Delta'} f(\mathbf{z}). \quad (25)$$

*Proof.* In the limit of  $T \rightarrow 0$ , we can rewrite the above problem as

$$\min_{\mathbf{s} \in EP(F)} \sum_{a=1}^N \max_i (-s'_{ai}). \quad (26)$$

In vector form, the problem becomes

$$\min_{\mathbf{s} \in EP(F)} \max_{\mathbf{z} \in \Delta} -\langle \mathbf{z}, \mathbf{s}' \rangle \quad (27)$$

$$= - \max_{\mathbf{s} \in EP(F)} \min_{\mathbf{z} \in \Delta} \langle \mathbf{z}, \mathbf{s}' \rangle \quad (28)$$

$$\text{where } \Delta = \{\mathbf{z}_a \in \mathbb{R}^L \mid \mathbf{z}_a \succeq 0 \text{ and } \langle \mathbf{1}, \mathbf{z}_a \rangle = 1\} \quad (29)$$

where  $\mathbf{z}_a$  is the component of  $\mathbf{z}$  corresponding to the  $a$ -th variable. We can unpack  $\mathbf{s}'$  using

$$s'_{ai} = \sum_{t \in p_{ai}} s_t. \quad (30)$$

and rewrite problem (28) as

$$- \max_{\mathbf{s} \in EP(F)} \min_{\mathbf{y} \in \Delta'} \langle \mathbf{y}, \mathbf{s} \rangle \quad (31)$$

The new constraint set  $\Delta'$  ensures that the binary entries of labels and meta-labels is consistent:

$$\text{where } \Delta' = \{\mathbf{y}_a \in \mathbb{R}^M \mid \mathbf{y}_a \succeq 0, \langle \mathbf{1}, \mathbf{y}_a^{label} \rangle = 1, \\ \mathbf{y}_a(p_{ai}) = \mathbf{1} \text{ or } \mathbf{y}_a(p_{ai}) = \mathbf{0} \forall i \in [1, L]\} \quad (32)$$

where  $\mathbf{y}_a$  is the component of  $\mathbf{y}$  corresponding to the  $a$ -th variable,  $\mathbf{y}_a^{label}$  is the component of  $\mathbf{y}_a$  corresponding to the  $L$  labels, and  $\mathbf{y}_a(p_{ai})$  is the component of  $\mathbf{y}_a$  corresponding to the elements of  $p_{ai}$ .

By the minimax theorem for LP, we can reorder the terms:

$$- \min_{\mathbf{y} \in \Delta'} \max_{\mathbf{s} \in EP(F)} \langle \mathbf{y}, \mathbf{s} \rangle \quad (33)$$

Recall that  $\max_{\mathbf{s} \in EP(F)} \langle \mathbf{y}, \mathbf{s} \rangle$  is the value of the Lovasz extension of  $F$  at  $\mathbf{y}$ , that is,  $f(\mathbf{y})$ . Hence, as  $T \rightarrow 0$ , the marginal inference problem converts to minimising the Lovasz extension under the constraints  $\Delta'$ :

$$- \min_{\mathbf{y} \in \Delta'} f(\mathbf{y}). \quad (34)$$

□

**Proposition 4.** *The objective function  $\tilde{E}(\mathbf{z})$  of (T-LP-FULL) is the Lovasz extension of  $F_{r\text{-HST}}(A) = \sum_{i=1}^M F_i(A)$ , where*

$$F_i(A) = \sum_a \phi'_a(i) [ |A \cap \{v_{ai}\}| = 1 ] + \\ \sum_{(a,b) \in \mathcal{N}} w_{ab} \cdot l_{T_i} \cdot [ |A \cap \{v_{ai}, v_{bi}\}| = 1 ]. \quad (35)$$

*Proof.* We observe that  $F_{r\text{-HST}}$  is of exactly the same form as  $F_{Potts}$ , except that the Ising models  $F_i$  are defined over not just labels, but meta-labels as well. Using the same logic as in the proof of proposition 2, each  $F_i$  is the Lovasz extension of

$$\tilde{E}_i(\mathbf{z}) = \left( \sum_{a \in \mathcal{X}} \phi'_a(i) \cdot z_{ai} + \sum_{(a,b) \in \mathcal{N}} w_{ab} \cdot l_{T_i} \cdot |z_{ai} - z_{bi}| \right) \quad (36)$$

and the results follows. □

**Proposition 5.** *Computing the subgradient of  $E(\mathbf{y})$  in (P-LP) is equivalent to computing the conditional gradient for the submodular function  $F_{Potts}$ .*

*Proof.* Due to Edmond's greedy algorithm, the Lovasz extension  $f$  of a given submodular function can be written as

$$f(\mathbf{y}) = \max_{\mathbf{s} \in EP(F)} \mathbf{y}^T \cdot \mathbf{s} \quad (37)$$

Hence,  $f(\mathbf{y})$  is the pointwise maximum of linear functions. The subdifferential of  $f(\mathbf{y})$  at  $\mathbf{y}_0$  is the differential of the 'active' linear function at  $\mathbf{y}_0$ . Hence,

$$\partial f(\mathbf{y}) = \operatorname{argmax}_{\mathbf{s} \in EP(F)} \mathbf{y}^T \cdot \mathbf{s} \quad (38)$$

This is exactly the computation of conditional gradient, and hence we have proved the equivalence.  $\square$
